# Supplementary material
Source: HighWire-hosted journal article supplement (https://heartasia.bmj.com/highwire/filestream/136902/field_highwire_adjunct_files/0/heartasia-2013-010334supp.pdf)
Supplement: heartasia-2013-010334supp.pdf [file heartasia-2013-010334supp.pdf]

**Movie 1:** Trans-thoracic echocardiography, showing left atrial myxoma.

**Movie 2:** Trans-oesophageal echocardiography, mid-oesophageal two chamber view, showing myxoma arising from left atrial appendage resembling an “elephant’s trunk” when prolapsing into left ventricle, during each diastole.
